# Supplementary material for: IAF, QGF, and QDF Peptides Exhibit Cholesterol-Lowering Activity through a Statin-like HMG-CoA Reductase Regulation Mechanism: In Silico and In Vitro Approach
Source: Int J Mol Sci. 2021 Oct 14;22(20):11067. doi: 10.3390/ijms222011067 (PMC8538380; doi:10.3390/ijms222011067)
Supplement: Supplementary file 1 [file ijms-22-11067-s001.zip › ijms-1389885-supplementary.pdf]

## Supplementary Material

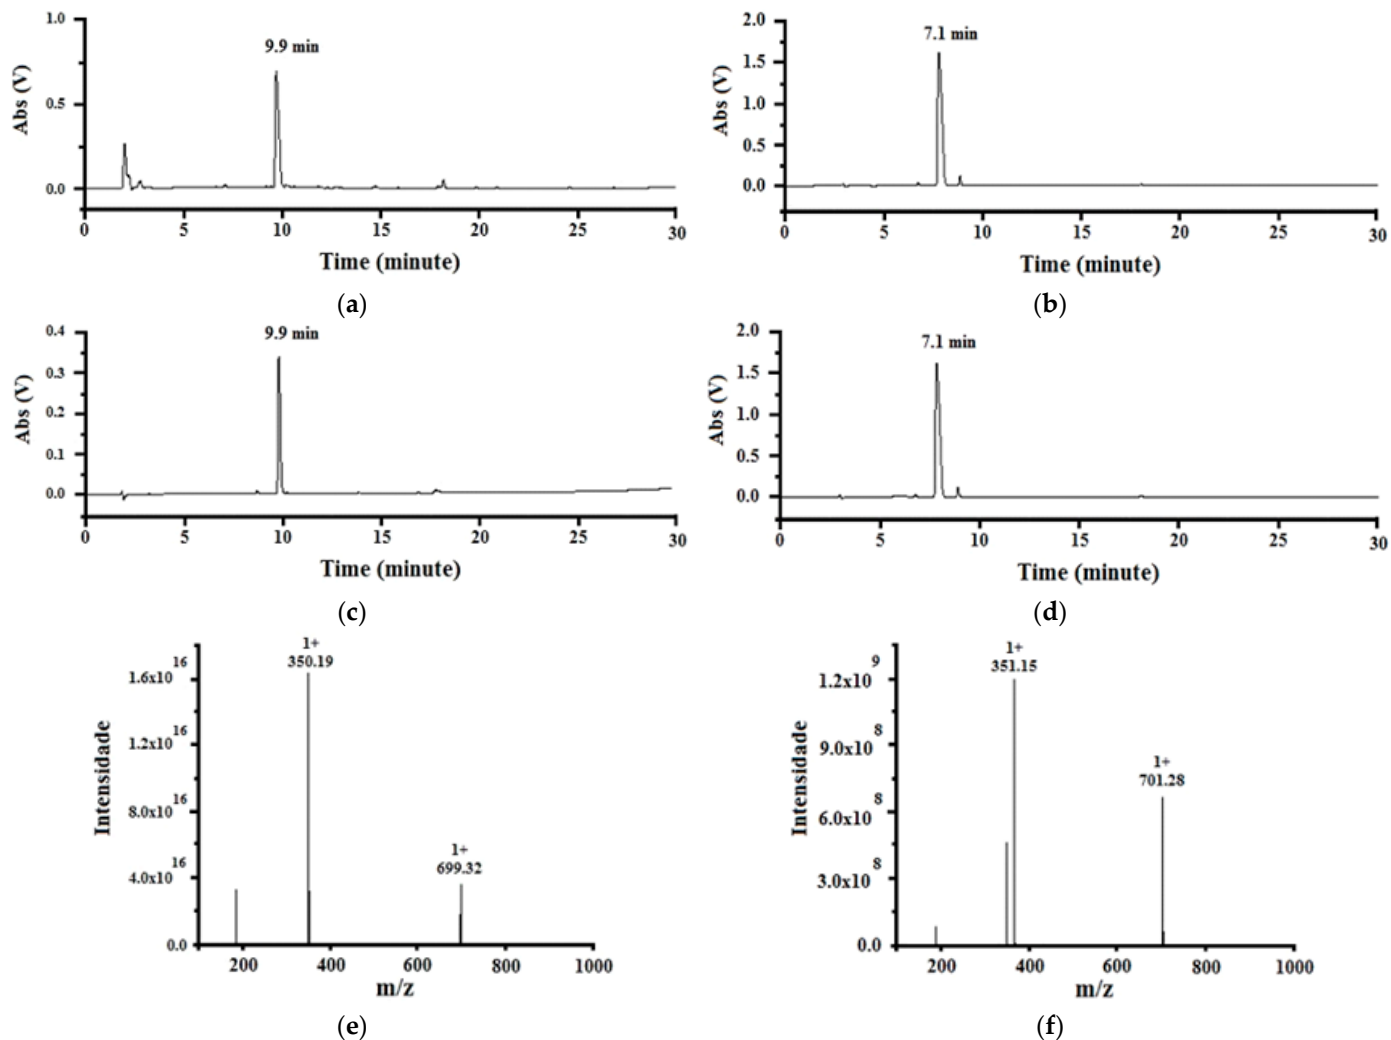

**Figure S1.** RP-HPLC chromatogram of the synthetic peptides. Chromatographic profile before purification (a,b); after the purification step (c,d); and mass spectrum (m/z, mass to charge ratio) of the IAF and QGF peptides (e,f), respectively.

**Table S1.** Experimental data of peptide synthesis.

| Peptides | Synthesis Yield (%) | Purity (%) | MW <sub>Theoretical</sub> (g/mol) | MW <sub>Measured</sub> (g/mol) |
|----------|---------------------|------------|-----------------------------------|--------------------------------|
| QGF      | 78.9                | 96.7       | 350.4                             | 351.2                          |
| IAF      | 74.6                | 98.1       | 349.4                             | 350.2                          |
| QDF      | 68.2                | 95.0       | 408.4                             | 408.2                          |

MW: molecular weight.
